# Supplementary material for: A bromocoumarin-based linker for synthesis of photocleavable peptidoconjugates with high photosensitivity
Source: Royal Society of Chemistry journal article supplement (doi:10.1039/b812058g), 2008-01-01
Supplement: b812058g.pdf [file b812058g.pdf]

**Supplementary Information**

**A bromocoumarin-based linker for synthesis of photocleavable  
peptidoconjugates with high photosensitivity**

Kentaro Katayama, Shinya Tsukiji, Toshiaki Furuta, and Teruyuki Nagamune\*

*Department of Chemistry and Biotechnology, Department of Bioengineering, School of  
Engineering, and Center for NanoBio Integration, The University of Tokyo, 7-3-1 Hongo,  
Bunkyo-ku, Tokyo 113-8656, Japan, Department of Biomolecular Science, Toho University,  
2-2-1 Miyama, Funabashi 274-8510, Japan*

*E-mail: nagamune@bioeng.t.u-tokyo.ac.jp*

### Synthesis of Bac linker building block 1

The starting precursor **2** was prepared in two steps from commercially available materials as previously reported.<sup>S1</sup>

### Synthesis of **3**

To a suspension of **2** (500 mg, 1.84 mmol) in anhydrous DMF (15 mL) were added potassium carbonate (0.51 g, 3.69 mmol) and 2-(*tert*-butoxycarbonylamino)ethyl bromide (2.06 g, 9.19 mmol). After stirring at room temperature for 48 h, the solvent was removed under vacuum. The resulting residue was dissolved in CHCl<sub>3</sub> (50 mL) and washed with water (50 mL × 2) and brine (50 mL). The organic layer was dried over anhydrous MgSO<sub>4</sub>, filtered, and concentrated. The crude residue was purified by column chromatography on silica gel (CHCl<sub>3</sub> to CHCl<sub>3</sub>/MeOH = 10/1) to give compound **3** as white powder (380 mg, 50 %).

<sup>1</sup>H-NMR (*d*-DMSO, 500 MHz): δ 7.91 (s, 1H), 7.22 (s, 1H), 6.96 (br, 1H), 6.34 (s, 1H), 5.64 (br, 1H), 4.72 (d, 2H), 4.16 (t, 2H), 3.35 (m, 2H), 1.38 (s, 9H).

MALDI-TOF-MS (CHCA): calcd for [M+Na]<sup>+</sup> = 436.04; obsd 435.75

### Synthesis of **4**

To a suspension of **3** (300 mg, 0.72 mmol) in CH<sub>2</sub>Cl<sub>2</sub> (18 mL) on an ice bath was added trifluoroacetic acid (2 mL). After stirring for 15 min, the solution was allowed to warm to room temperature and stirred for a further 2 h. The solvent was removed under vacuum and the resulting residue was re-dissolved in anhydrous DMF (20 mL). To the solution were added *N,N*-diisopropylethylamine (DIEA, 502 μL, 2.95 mmol) and 9-fluorenylmethyl succinimidyl carbonate (Fmoc-OSu, 292 mg, 0.87 mmol). The reaction mixture was stirred at room temperature for 0.5 h. After evaporation, the residue was dissolved in EtOAc (50 mL) and washed with 0.1 N aqueous HCl (50 mL × 2). The organic layer was dried over anhydrous MgSO<sub>4</sub>, filtered, and concentrated. The crude residue was purified by column chromatography on silica gel (CHCl<sub>3</sub> to CHCl<sub>3</sub>/MeOH = 15/1) to give compound **4** as white powder (360 mg, 93 %).

<sup>1</sup>H-NMR (*d*-DMSO, 500 MHz): δ 7.91 (s, 1H), 7.88 (d, 2H), 7.69 (d, 2H), 7.51 (br, 1H), 7.40 (t, 2H), 7.31 (t, 3H), 7.24 (s, 1H), 6.34 (s, 1H), 5.65 (t, 1H), 4.72 (d, 2H), 4.33 (d, 2H), 4.23-4.18 (m, 3H), 3.42 (m, 2H).

MALDI-TOF-MS (CHCA): calcd for [M+Na]<sup>+</sup> = 558.05; obsd 558.09

### **Synthesis of 1**

To a suspension of **4** (300 mg, 0.56 mmol) in CH<sub>2</sub>Cl<sub>2</sub> (20mL) were added DIEA (878 μl, 5.16 mmol) and 4-nitrophenyl chloroformate (1.15 g, 5.70 mmol). After stirring for 15 min, the solution was allowed to warm to room temperature and stirred for a further 2 h. The reaction solution was washed with 0.01 M aqueous HCl (50 mL × 2), and the organic layer was dried over anhydrous MgSO<sub>4</sub>, filtered, and concentrated. The crude residue was purified by column chromatography on silica gel (CHCl<sub>3</sub>) to give compound **1** as white powder (356 mg, 91%).

<sup>1</sup>H-NMR (CDCl<sub>3</sub>, 500 MHz): δ 8.32 (d, 2H), 7.75 (d, 2H), 7.71 (s, 1H), 7.59 (d, 2H), 7.43 (d, 2H), 7.38 (t, 2H), 7.30 (t, 2H), 6.89 (s, 1H), 6.50 (s, 1H), 5.42 (s, 2H), 5.24 (br, 1H), 4.45 (d, 2H), 4.22 (t, 1H), 4.17 (t, 2H), 3.72 (m, 2H).

MALDI-TOF-MS (CHCA): calcd for [M+Na]<sup>+</sup> = 723.06; obsd 723.50.

### **Peptide Synthesis**

The peptides were synthesized manually on a Rink Amide resin by standard Fmoc-based solid-phase peptide synthesis protocol. Fmoc-Arg(Pbf)-OH, Fmoc-Asp(OtBu)-OH, Fmoc-Gly-OH, Fmoc-Lys(Boc)-OH, Fmoc-Lys(Mtt)-OH, Fmoc-Ser(tBu)-OH, Fmoc-Tyr(tBu)-OH, and **1** were used as building blocks. In the synthesis of **5**, (+)-biotin was also used. Fmoc deprotection was performed with 20% piperidine in DMF and coupling reactions were performed with a mixture of Fmoc-amino acid, diisopropylcarbodiimide (DIC), and HOBt in DMF. Incorporation of the Bac linker was carried out by double coupling using **1** (2 eq) and DIEA (2 eq) in DMF. Acetylation was performed with acetic anhydride and DIEA in DMF. In the case of the branched peptidoconjugate **6**, the Mtt group of protected FLAG resin **7** was selectively removed by treatment with CH<sub>2</sub>Cl<sub>2</sub> containing 2% TFA and 5% triisopropylsilane. All coupling and Fmoc deprotection steps were monitored by the Kaiser test.<sup>S2</sup> Following chain assembly, global deprotection and cleavage from the resin was performed with TFA containing 2.5% ethanedithiol and 2.5% H<sub>2</sub>O. The crude peptide products were precipitated by Et<sub>2</sub>O and purified by reversed-phase HPLC using a semi-preparative YMC-Pack ODS-A column with a linear gradient of 0.1% aqueous TFA and acetonitrile containing 0.1% TFA. The peptides were identified by MALDI-TOF-MS (CHCA): linear form **5** calcd for [M+H]<sup>+</sup> = 1867.67, obsd 1868.03;

branched form **9** calcd for  $[M+H]^+ = 2530.49$ , obsd 2530.23.

### Evaluation of Photochemical Properties<sup>S1</sup>

The photocleavable peptidoconjugate solutions (**5**, 9  $\mu\text{M}$ ; **6**, 8  $\mu\text{M}$ ) in 1 mL of K-MOPS buffer (10 mM MOPS, 100 mM KCl, pH 7.2) were placed in a Pyrex test tube of 12 mm diameter and irradiated in a RPR-200 preparative reactor (Rayonet, The Southern New England Ultraviolet Co.) equipped with two RPR 350 nm lamps ( $\approx 10 \text{ mJ}\cdot\text{s}^{-1}$ ). Aliquots of 10  $\mu\text{L}$  were taken at defined time points and analyzed by RP-HPLC on an analytical COSMOSIL 5C<sub>18</sub>-AR-II column with a linear gradient of 0.1% aqueous TFA and acetonitrile containing 0.1% TFA using absorbance detection at 220 or 325 nm. The apparent first-order rate constant for the photolytic consumption of the starting material ( $k$ ) was obtained by fitting a plot of the remaining % of the starting material ( $P$ ) as a function of irradiation time ( $t$  in seconds) to the first-order equation (1):  $P = 100 \cdot \exp(-k \cdot t)$ . The quantum yield of photolysis ( $\Phi$ ) was determined by the following equation (2):

$$\Phi = 1 / (1000 \cdot I \cdot \epsilon_{350} \cdot t_{90\%})$$

where  $I$  is the light intensity ( $\text{einstein}\cdot\text{cm}^{-2}\cdot\text{s}^{-1}$ ),  $\epsilon_{350}$  is the molar absorption coefficient ( $\text{M}^{-1}\cdot\text{cm}^{-1}$ ) of the Bac group at 350 nm, and  $t_{90\%}$  is the irradiation time in seconds for 90% consumption of the starting material calculated from the equation (1). The UV intensity  $I$  was measured by potassium ferrioxalate actinometry. Experiments were carried out in triplicate and the average values were used for calculations.

### References

- [S1] T. Furuta, S. S.-H. Wang, J. L. Dantzker, T. M. Dore, W. J. Bybee, E. M. Callaway, W. Denk and R. Y. Tsien, *Proc. Natl. Acad. Sci. U. S. A.*, 1999, **96**, 1193-1200.
- [S2] E. Kaiser, R. L. Colescott, C. D. Bossinger and P. I. Cook, *Anal. Biochem.*, 1970, **34**, 595-598.

**Supplementary Figures**

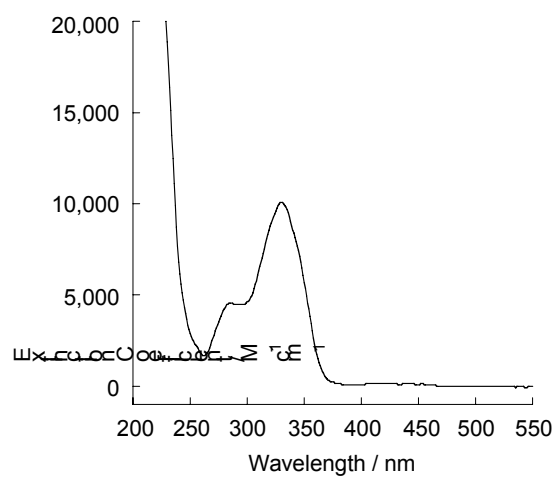

**Fig. S1** UV/vis spectrum of **5** in K-MOPS buffer.  $\lambda_{\text{max}} = 330$  nm.

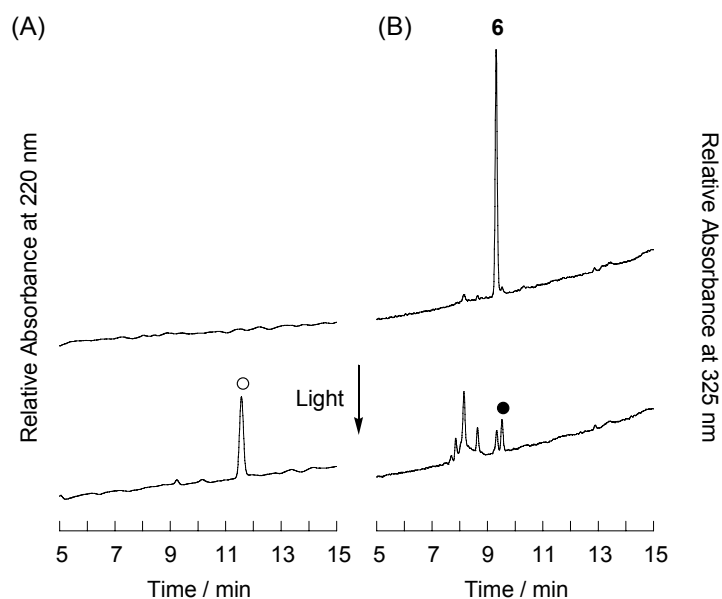

**Fig. S2** HPLC traces of **6** before (top) and after (bottom) UV photolysis (350 nm, 2 min). Conditions: 8  $\mu$ M in K-MOPS buffer. HPLC was performed on an ODS column with a linear gradient of acetonitrile containing 0.1% TFA (solvent A) and 0.1% aqueous TFA (solvent B). (A) Detection at 220 nm. Gradient: A/B = 4:90 to 10:60 for 15 min. Peak ○ denotes Ac-FLAG (Ac-DYKDDDDK-NH<sub>2</sub>). (B) Detection at 325 nm. Gradient: A/B = 10:90 to 40:60 for 15 min. Peak ● denotes Ac-R<sub>7</sub>-Bac<sub>OH</sub>.
